# Supplementary material
Source: publisher figshare collection journal article supplement (https://tandf.figshare.com/ndownloader/files/22666673)

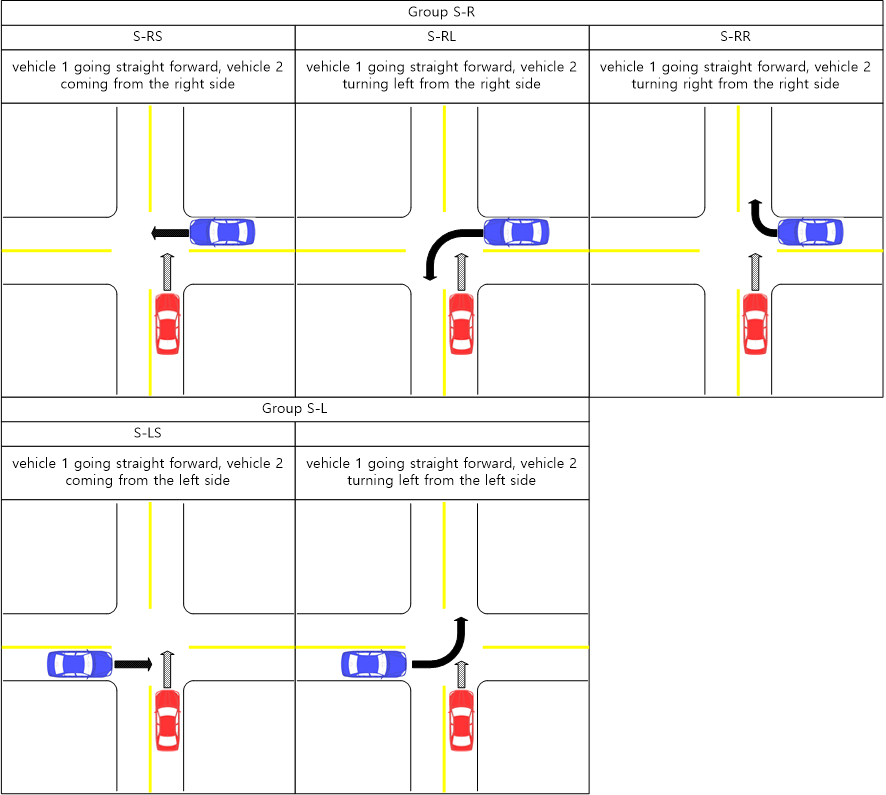


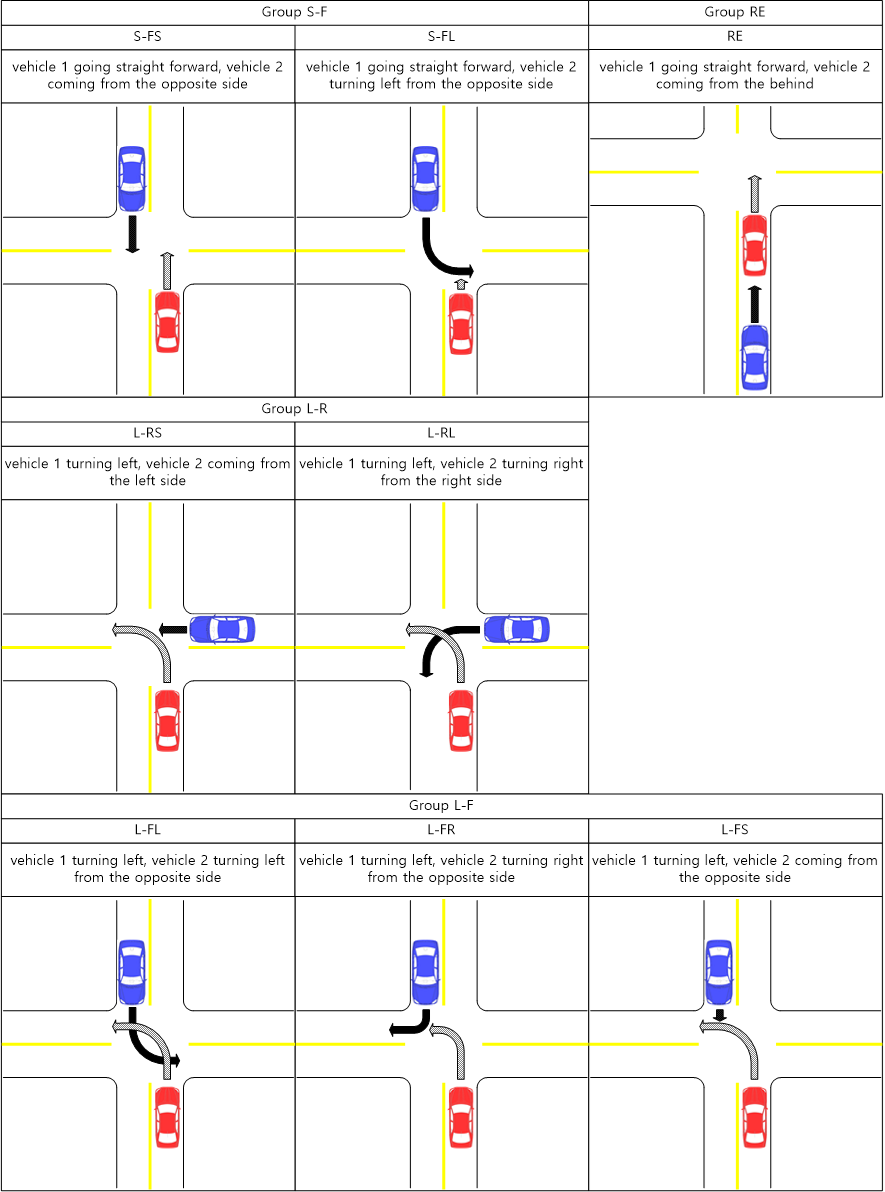


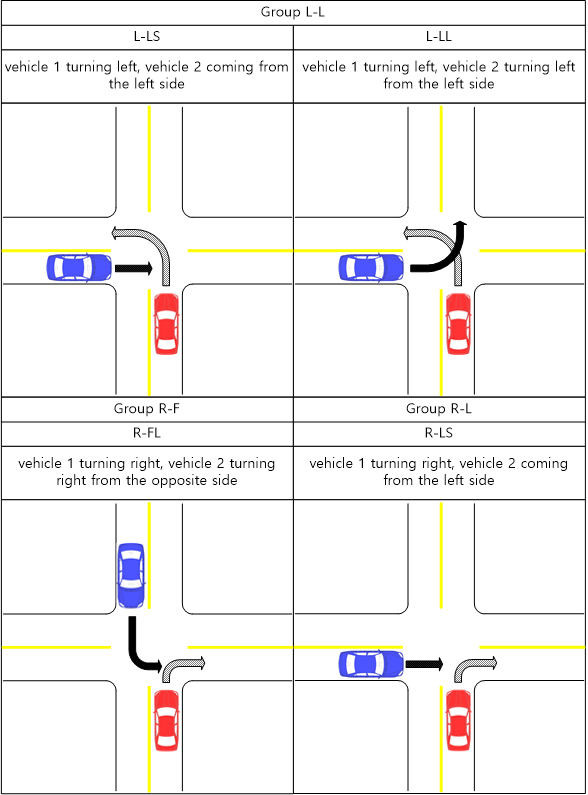


**Figure A1.** Categorized scenarios of intersection collision accidents

Supplement: Supplementary file 1 [file 22666673]
